# Supplementary material for: Convergence in biomineralization patterns across animal eggshells
Source: Royal Society of Chemistry journal article supplement (doi:10.1039/d5fd00028a), 2025-01-01
Supplement: d5fd00028a1.pdf [file d5fd00028a1.pdf]

## **Supplementary information**

for

### **Convergence in biomineralization patterns across animal eggshells**

#### **Table of Contents**

##### **Supplementary figures:**

Supplementary figure 1

Supplementary figure 2

Supplementary figure 3

Supplementary figure 4

##### **Supplementary tables:**

Supplementary table 1

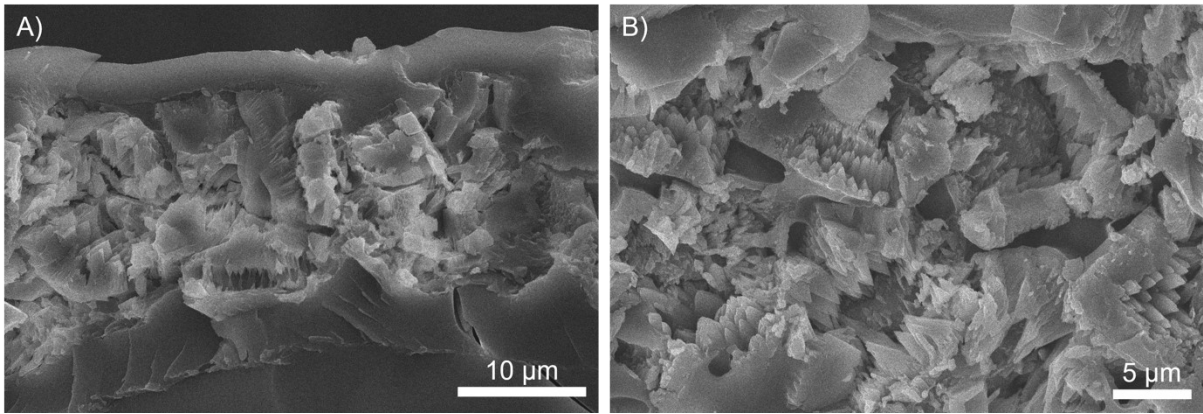

**Supplementary figure 1** Microstructure of *Helix pomatia* eggshells. Scanning electron images showing the cross section of the eggshell of *Helix pomatia* at two different magnifications.

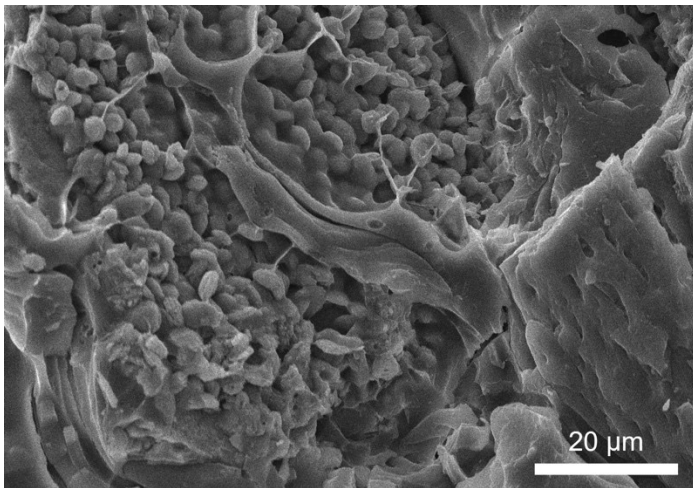

**Supplementary figure 2** Vaterite spherulites of *Pomacea canaliculata*. Scanning electron microscope image shows the vaterite spherulites in between two adjacent eggs in the egg mass of *Pomacea canaliculata*.

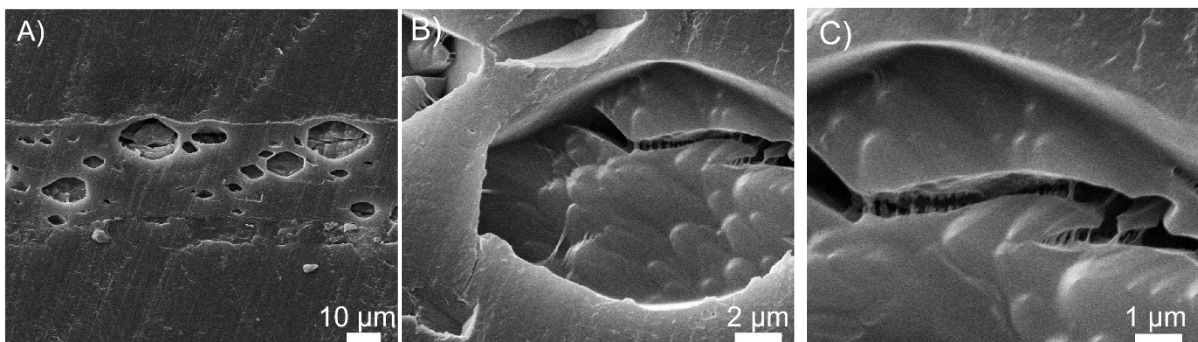

**Supplementary figure 3** Organic matrix in calcium oxalate crystals of *Periplanata lateralis*. Scanning electron microscopy at different magnifications shows the presence of organic fibrils.

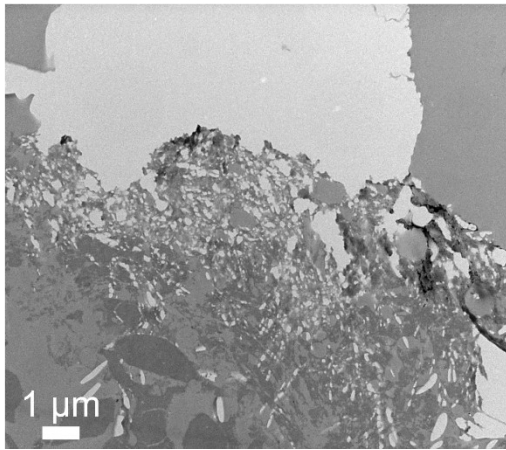

**Supplementary figure 4 Organic matrix of *Pelusios carinatus*.** Transmission electron microscopy image shows the presence of the organic matrix near the mamillary knobs below the empty space represents the location where the rest of the calcium unit was but became detached.

**Supplementary Table 1: Overview of examined eggshell from different taxa and their source.**

| Class      | Order             | Species                       | English name                  | Source          |
|------------|-------------------|-------------------------------|-------------------------------|-----------------|
| Insecta    | Blattodea         | <i>Periplaneta lateralis</i>  | Turkestan cockroach           | Private breeder |
| Insecta    | Phasmatodea       | <i>Diapherodes gigantea</i>   | Giant lime green stick-insect | Private breeder |
| Insecta    | Phasmatodea       | <i>Rhynchacris ornata</i>     | Stick insect                  | Private breeder |
| Insecta    | Phasmatodea       | <i>Mearnsiana bullosa</i>     | Manobos stick insect          | Private breeder |
| Reptilia   | Testudines        | <i>Pelusios carinatus</i>     | African keeled mud turtle     | Zoo Antwerp     |
| Reptilia   | Crocodylia        | <i>Caiman crocodilus</i>      | Spectacled caiman             | Zoo Antwerp     |
| Gastropoda | Stylommatophora   | <i>Achatina fulica</i>        | Giant African snail           | Private breeder |
| Gastropoda | Stylommatophora   | <i>Archachatina marginata</i> | Banana rasp snail             | Private breeder |
| Gastropoda | Stylommatophora   | <i>Helix aspersa</i>          | Garden snail                  | Private breeder |
| Gastropoda | Archataenioglossa | <i>Pomacea canaliculata</i>   | Apple snail                   | Private breeder |
| Aves       | Rheiformes        | <i>Rhea americana</i>         | Greater rhea                  | Private breeder |
| Aves       | Psittaciformes    | <i>Psittacula roseata</i>     | Blossom-headed parakeet       | Private breeder |
